# Supplementary material
Source: PubMed Central journal article supplement (PMC1637546)

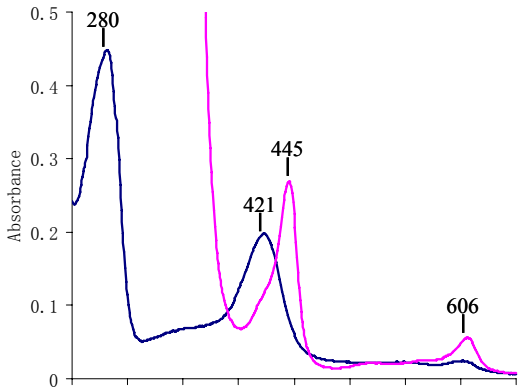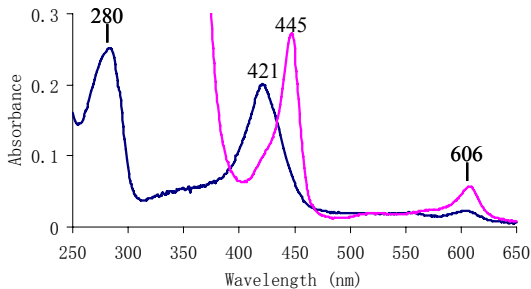

Supplement: pnas_0606149103_1.pdf [file pnas_0606149103_1.pdf]

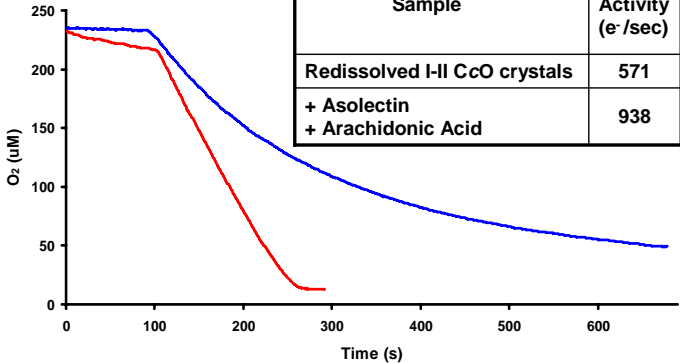

Supplement: pnas_0606149103_2.pdf [file pnas_0606149103_2.pdf]

(A)

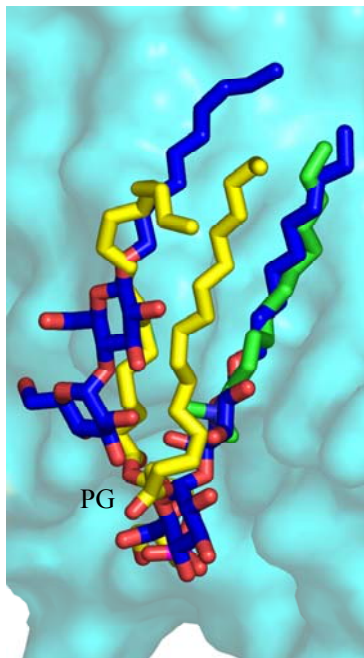

(B)

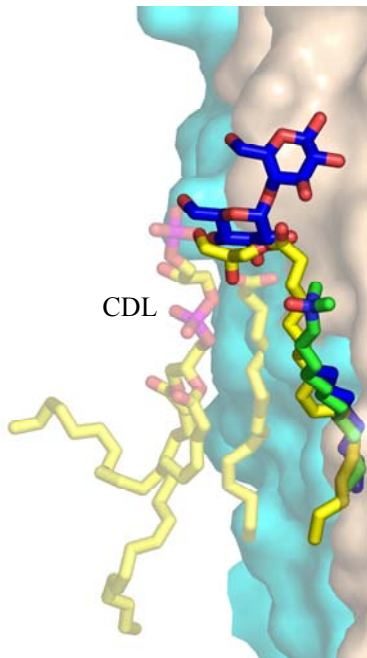

Supplement: pnas_0606149103_3.pdf [file pnas_0606149103_3.pdf]
